# Supplementary material for: Short-term dynamics of input and output of CA1 network greatly differ between the dorsal and ventral rat hippocampus
Source: PubMed Central journal article supplement (PMC6647178; doi:10.1186/s12868-019-0517-5), 2019-07-22

# DH

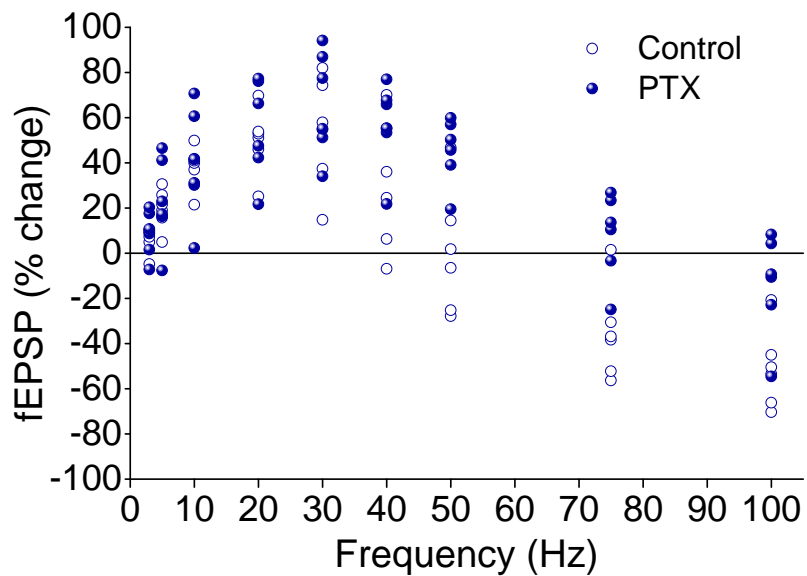

# VH

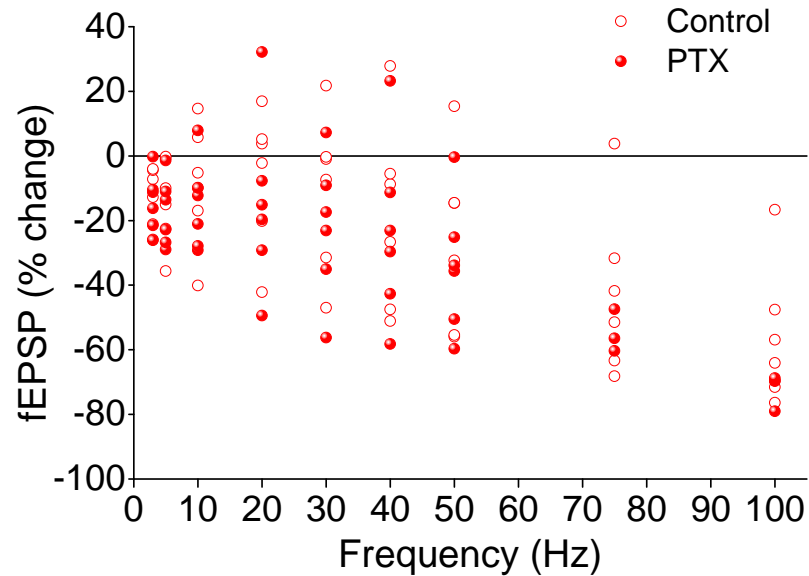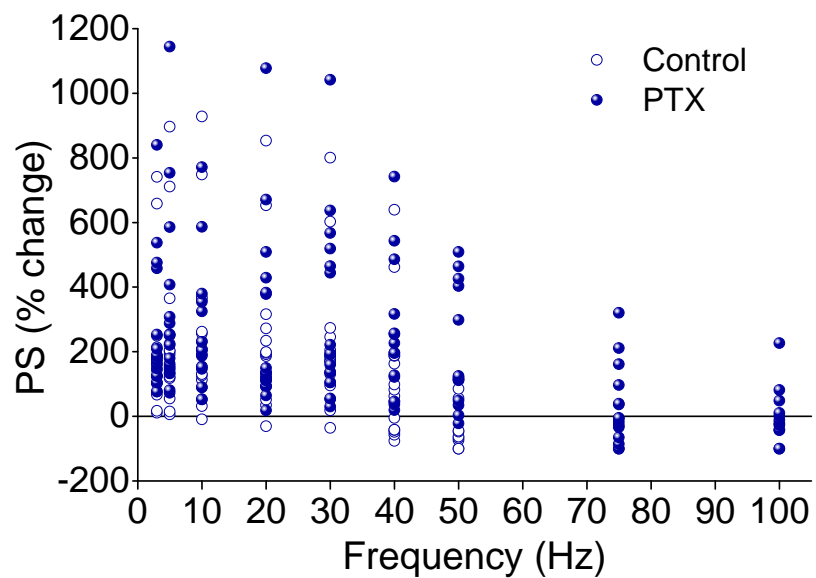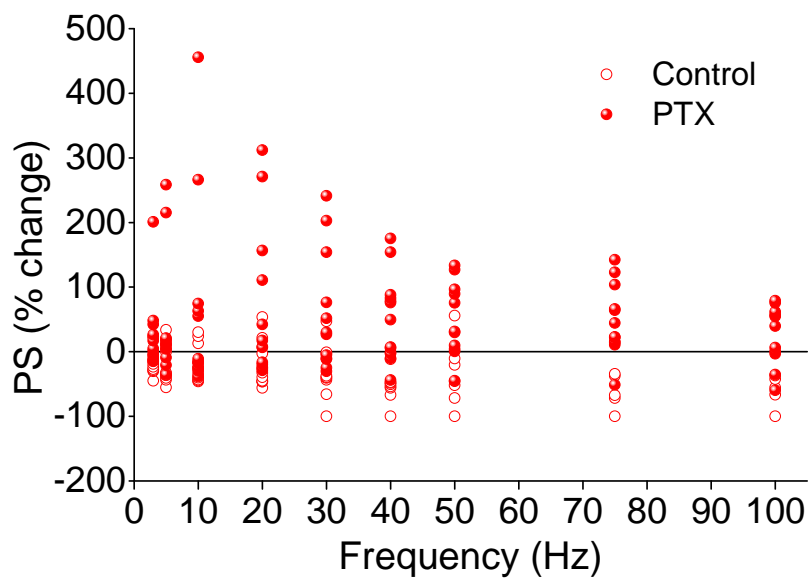

Supplement: 12868_2019_517_MOESM2_ESM.pdf [file 12868_2019_517_MOESM2_ESM.pdf]
